# Supplementary material for: Structural Characterization and Dynamics of a Layered 2D Perovskite [NH3(CH2)5NH3]MnCl4 Crystal near Phase Transition Temperature
Source: MDPI journal article supplement (doi:10.3390/cryst12091298), 2022-09-14
Supplement: s1 [file s1]

. Table S1. Crystal data and structure refinement for 1\_330K\_a.

|                                   |                                                                  |          |
|-----------------------------------|------------------------------------------------------------------|----------|
| Identification code               | 1_330K_a                                                         |          |
| Empirical formula                 | C <sub>5</sub> H <sub>16</sub> Cl <sub>4</sub> Mn N <sub>2</sub> |          |
| Formula weight                    | 300.94                                                           |          |
| Temperature                       | 330(2) K                                                         |          |
| Wavelength                        | 0.71073 Å                                                        |          |
| Crystal system                    | Orthorhombic                                                     |          |
| Space group                       | Imma                                                             |          |
| Unit cell dimensions              | a = 23.9162(13) Å                                                | α = 90°. |
|                                   | b = 7.1877(4) Å                                                  | β = 90°. |
|                                   | c = 7.3898(3) Å                                                  | γ = 90°. |
| Volume                            | 1270.32(11) Å <sup>3</sup>                                       |          |
| Z                                 | 4                                                                |          |
| Density (calculated)              | 1.574 Mg/m <sup>3</sup>                                          |          |
| Absorption coefficient            | 1.838 mm <sup>-1</sup>                                           |          |
| F(000)                            | 612                                                              |          |
| Crystal size                      | 0.195 x 0.144 x 0.065 mm <sup>3</sup>                            |          |
| Theta range for data collection   | 2.885 to 28.291°.                                                |          |
| Index ranges                      | -20 ≤ h ≤ 31, -9 ≤ k ≤ 9, -9 ≤ l ≤ 9                             |          |
| Reflections collected             | 5258                                                             |          |
| Independent reflections           | 863 [R(int) = 0.0304]                                            |          |
| Completeness to theta = 25.242°   | 98.3 %                                                           |          |
| Absorption correction             | Semi-empirical from equivalents                                  |          |
| Max. and min. transmission        | 0.7457 and 0.6389                                                |          |
| Refinement method                 | Full-matrix least-squares on F <sup>2</sup>                      |          |
| Data / restraints / parameters    | 863 / 0 / 38                                                     |          |
| Goodness-of-fit on F <sup>2</sup> | 1.118                                                            |          |
| Final R indices [I > 2σ(I)]       | R1 = 0.0312, wR2 = 0.0957                                        |          |
| R indices (all data)              | R1 = 0.0330, wR2 = 0.0974                                        |          |
| Extinction coefficient            | n/a                                                              |          |
| Largest diff. peak and hole       | 0.326 and -0.455 e.Å <sup>-3</sup>                               |          |

Table S2. Atomic coordinates ( $\times 10^4$ ) and equivalent isotropic displacement parameters ( $\text{\AA}^2 \times 10^3$ ) for 1\_330K\_a.  $U(\text{eq})$  is defined as one third of the trace of the orthogonalized  $U^{ij}$  tensor.

|       | x       | y    | z       | U(eq) |
|-------|---------|------|---------|-------|
| Mn(1) | 7500    | 7500 | 2500    | 28(1) |
| Cl(1) | 7395(1) | 5000 | 0       | 39(1) |
| Cl(2) | 6468(1) | 7500 | 2943(1) | 45(1) |
| N(1)  | 6564(1) | 7500 | 7287(4) | 50(1) |
| C(1)  | 6037(2) | 7500 | 8172(5) | 73(1) |
| C(2)  | 5531(2) | 7500 | 7196(6) | 90(2) |
| C(3)  | 5000    | 7500 | 8119(9) | 73(2) |

Table S3. Bond lengths [ $\text{\AA}$ ] and angles [ $^\circ$ ] for 1\_330K\_a.

|                       |             |
|-----------------------|-------------|
| Mn(1)-Cl(2)           | 2.4903(7)   |
| Mn(1)-Cl(2)#1         | 2.4904(7)   |
| Mn(1)-Cl(1)#1         | 2.58945(11) |
| Mn(1)-Cl(1)#2         | 2.58945(11) |
| Mn(1)-Cl(1)#3         | 2.58945(11) |
| Mn(1)-Cl(1)           | 2.58945(11) |
| N(1)-C(1)             | 1.421(5)    |
| N(1)-H(1A)            | 0.8900      |
| N(1)-H(1B)            | 0.8900      |
| N(1)-H(1C)            | 0.8900      |
| C(1)-C(2)             | 1.409(5)    |
| C(1)-H(1D)            | 0.9700      |
| C(1)-H(1E)            | 0.9700      |
| C(2)-C(3)             | 1.441(5)    |
| C(2)-H(2A)            | 0.9700      |
| C(2)-H(2B)            | 0.9700      |
| C(3)-H(3A)            | 0.9700      |
| C(3)-H(3B)            | 0.9700      |
| Cl(2)-Mn(1)-Cl(2)#1   | 180.0       |
| Cl(2)-Mn(1)-Cl(1)#1   | 90.14(2)    |
| Cl(2)#1-Mn(1)-Cl(1)#1 | 89.86(2)    |
| Cl(2)-Mn(1)-Cl(1)#2   | 89.86(2)    |
| Cl(2)#1-Mn(1)-Cl(1)#2 | 90.14(2)    |
| Cl(1)#1-Mn(1)-Cl(1)#2 | 92.114(5)   |
| Cl(2)-Mn(1)-Cl(1)#3   | 90.14(2)    |
| Cl(2)#1-Mn(1)-Cl(1)#3 | 89.86(2)    |
| Cl(1)#1-Mn(1)-Cl(1)#3 | 87.886(5)   |
| Cl(1)#2-Mn(1)-Cl(1)#3 | 180.0       |
| Cl(2)-Mn(1)-Cl(1)     | 89.86(2)    |
| Cl(2)#1-Mn(1)-Cl(1)   | 90.14(2)    |
| Cl(1)#1-Mn(1)-Cl(1)   | 180.0       |
| Cl(1)#2-Mn(1)-Cl(1)   | 87.886(5)   |

|                     |           |
|---------------------|-----------|
| Cl(1)#3-Mn(1)-Cl(1) | 92.114(5) |
| Mn(1)-Cl(1)-Mn(1)#4 | 168.85(3) |
| C(1)-N(1)-H(1A)     | 109.5     |
| C(1)-N(1)-H(1B)     | 109.5     |
| H(1A)-N(1)-H(1B)    | 109.5     |
| C(1)-N(1)-H(1C)     | 109.5     |
| H(1A)-N(1)-H(1C)    | 109.5     |
| H(1B)-N(1)-H(1C)    | 109.5     |
| C(2)-C(1)-N(1)      | 121.8(3)  |
| C(2)-C(1)-H(1D)     | 106.9     |
| N(1)-C(1)-H(1D)     | 106.9     |
| C(2)-C(1)-H(1E)     | 106.9     |
| N(1)-C(1)-H(1E)     | 106.9     |
| H(1D)-C(1)-H(1E)    | 106.7     |
| C(1)-C(2)-C(3)      | 120.9(4)  |
| C(1)-C(2)-H(2A)     | 107.1     |
| C(3)-C(2)-H(2A)     | 107.1     |
| C(1)-C(2)-H(2B)     | 107.1     |
| C(3)-C(2)-H(2B)     | 107.1     |
| H(2A)-C(2)-H(2B)    | 106.8     |
| C(2)#5-C(3)-C(2)    | 123.5(6)  |
| C(2)#5-C(3)-H(3A)   | 106.5     |
| C(2)-C(3)-H(3A)     | 106.5     |
| C(2)#5-C(3)-H(3B)   | 106.5     |
| C(2)-C(3)-H(3B)     | 106.5     |
| H(3A)-C(3)-H(3B)    | 106.5     |

---

Symmetry transformations used to generate equivalent atoms:

#1  $-x+3/2, -y+3/2, -z+1/2$     #2  $x, y+1/2, -z$     #3  $-x+3/2, -y+1, z+1/2$   
#4  $-x+3/2, -y+1, z-1/2$     #5  $-x+1, -y+3/2, z$

Table S4. Anisotropic displacement parameters ( $\text{\AA}^2 \times 10^3$ ) for 1\_330K\_a. The anisotropic displacement factor exponent takes the form:  $-2\pi^2 [h^2 a^{*2} U^{11} + \dots + 2 h k a^* b^* U^{12}]$

|       | $U^{11}$ | $U^{22}$ | $U^{33}$ | $U^{23}$ | $U^{13}$ | $U^{12}$ |
|-------|----------|----------|----------|----------|----------|----------|
| Mn(1) | 33(1)    | 26(1)    | 24(1)    | 0        | 1(1)     | 0        |
| Cl(1) | 51(1)    | 32(1)    | 33(1)    | -10(1)   | 0        | 0        |
| Cl(2) | 33(1)    | 64(1)    | 37(1)    | 0        | 0(1)     | 0        |
| N(1)  | 34(1)    | 75(2)    | 42(1)    | 0        | -4(1)    | 0        |
| C(1)  | 33(2)    | 140(4)   | 46(2)    | 0        | 1(2)     | 0        |
| C(2)  | 32(2)    | 179(7)   | 57(2)    | 0        | 0(2)     | 0        |
| C(3)  | 35(2)    | 122(6)   | 63(3)    | 0        | 0        | 0        |

Table S5. Hydrogen coordinates (  $\times 10^4$ ) and isotropic displacement parameters ( $\text{\AA}^2 \times 10^{-3}$ ) for 1\_330K\_a.

|       | x    | y    | z    | U(eq) |
|-------|------|------|------|-------|
| H(1A) | 6836 | 7500 | 8110 | 75    |
| H(1B) | 6593 | 6489 | 6598 | 75    |
| H(1C) | 6593 | 8511 | 6598 | 75    |
| H(1D) | 6030 | 6417 | 8956 | 88    |
| H(1E) | 6030 | 8583 | 8956 | 88    |
| H(2A) | 5536 | 6417 | 6413 | 108   |
| H(2B) | 5536 | 8583 | 6413 | 108   |
| H(3A) | 5000 | 6419 | 8904 | 88    |
| H(3B) | 5000 | 8581 | 8904 | 88    |
