# Supplementary material for: Structural Characterization and Dynamics of a Layered 2D Perovskite [NH3(CH2)5NH3]MnCl4 Crystal near Phase Transition Temperature
Source: MDPI journal article supplement (doi:10.3390/cryst12091298), 2022-09-14
Supplement: s1 [file s1]

. Table S1. Crystal data and structure refinement for Imma\_a.

|                                   |                                                                  |          |
|-----------------------------------|------------------------------------------------------------------|----------|
| Identification code               | Imma_a                                                           |          |
| Empirical formula                 | C <sub>5</sub> H <sub>16</sub> Cl <sub>4</sub> Mn N <sub>2</sub> |          |
| Formula weight                    | 300.94                                                           |          |
| Temperature                       | 173(2) K                                                         |          |
| Wavelength                        | 0.71073 Å                                                        |          |
| Crystal system                    | Orthorhombic                                                     |          |
| Space group                       | Imma                                                             |          |
| Unit cell dimensions              | a = 24.1756(9) Å                                                 | α = 90°. |
|                                   | b = 7.1535(3) Å                                                  | β = 90°. |
|                                   | c = 7.3314(3) Å                                                  | γ = 90°. |
| Volume                            | 1267.89(9) Å <sup>3</sup>                                        |          |
| Z                                 | 4                                                                |          |
| Density (calculated)              | 1.577 Mg/m <sup>3</sup>                                          |          |
| Absorption coefficient            | 1.842 mm <sup>-1</sup>                                           |          |
| F(000)                            | 612                                                              |          |
| Crystal size                      | 0.213 x 0.156 x 0.105 mm <sup>3</sup>                            |          |
| Theta range for data collection   | 2.903 to 28.317°.                                                |          |
| Index ranges                      | -31 ≤ h ≤ 32, -7 ≤ k ≤ 9, -9 ≤ l ≤ 9                             |          |
| Reflections collected             | 5418                                                             |          |
| Independent reflections           | 867 [R(int) = 0.0413]                                            |          |
| Completeness to theta = 25.242°   | 98.5 %                                                           |          |
| Absorption correction             | Semi-empirical from equivalents                                  |          |
| Max. and min. transmission        | 0.7457 and 0.6588                                                |          |
| Refinement method                 | Full-matrix least-squares on F <sup>2</sup>                      |          |
| Data / restraints / parameters    | 867 / 0 / 38                                                     |          |
| Goodness-of-fit on F <sup>2</sup> | 1.070                                                            |          |
| Final R indices [I > 2σ(I)]       | R1 = 0.0383, wR2 = 0.1178                                        |          |
| R indices (all data)              | R1 = 0.0394, wR2 = 0.1190                                        |          |
| Extinction coefficient            | n/a                                                              |          |
| Largest diff. peak and hole       | 0.593 and -0.957 e.Å <sup>-3</sup>                               |          |

Table S2. Atomic coordinates ( $\times 10^4$ ) and equivalent isotropic displacement parameters ( $\text{\AA}^2 \times 10^3$ ) for Imma\_a.  $U(\text{eq})$  is defined as one third of the trace of the orthogonalized  $U^{ij}$  tensor.

|       | x       | y    | z       | U(eq) |
|-------|---------|------|---------|-------|
| Mn(1) | 2500    | 2500 | 7500    | 13(1) |
| Cl(1) | 3524(1) | 2500 | 7031(1) | 24(1) |
| Cl(2) | 2613(1) | 5000 | 10000   | 35(1) |
| N(1)  | 3443(1) | 2500 | 2687(5) | 34(1) |
| C(1)  | 5000    | 2500 | 1875(9) | 46(2) |
| C(2)  | 3968(2) | 2500 | 1827(6) | 55(2) |
| C(3)  | 4472(2) | 2500 | 2773(7) | 70(3) |

Table S3. Bond lengths [ $\text{\AA}$ ] and angles [ $^\circ$ ] for Imma\_a.

|                       |             |
|-----------------------|-------------|
| Mn(1)-Cl(1)           | 2.4984(8)   |
| Mn(1)-Cl(1)#1         | 2.4984(8)   |
| Mn(1)-Cl(2)#1         | 2.57524(12) |
| Mn(1)-Cl(2)#2         | 2.57524(12) |
| Mn(1)-Cl(2)#3         | 2.57524(12) |
| Mn(1)-Cl(2)           | 2.57524(12) |
| N(1)-C(2)             | 1.417(5)    |
| N(1)-H(1NA)           | 0.9100      |
| N(1)-H(1NB)           | 0.9100      |
| N(1)-H(1NC)           | 0.9100      |
| C(1)-C(3)             | 1.436(5)    |
| C(1)-C(3)#4           | 1.436(5)    |
| C(1)-H(1A)            | 0.9900      |
| C(1)-H(1B)            | 0.9900      |
| C(2)-C(3)             | 1.403(6)    |
| C(2)-H(2A)            | 0.9900      |
| C(2)-H(2B)            | 0.9900      |
| C(3)-H(3A)            | 0.9900      |
| C(3)-H(3B)            | 0.9900      |
| Cl(1)-Mn(1)-Cl(1)#1   | 180.0       |
| Cl(1)-Mn(1)-Cl(2)#1   | 90.39(2)    |
| Cl(1)#1-Mn(1)-Cl(2)#1 | 89.61(2)    |
| Cl(1)-Mn(1)-Cl(2)#2   | 89.61(2)    |
| Cl(1)#1-Mn(1)-Cl(2)#2 | 90.39(2)    |
| Cl(2)#1-Mn(1)-Cl(2)#2 | 92.033(5)   |
| Cl(1)-Mn(1)-Cl(2)#3   | 90.39(2)    |
| Cl(1)#1-Mn(1)-Cl(2)#3 | 89.61(2)    |
| Cl(2)#1-Mn(1)-Cl(2)#3 | 87.967(5)   |
| Cl(2)#2-Mn(1)-Cl(2)#3 | 180.0       |
| Cl(1)-Mn(1)-Cl(2)     | 89.60(2)    |
| Cl(1)#1-Mn(1)-Cl(2)   | 90.40(2)    |
| Cl(2)#1-Mn(1)-Cl(2)   | 180.0       |

|                     |           |
|---------------------|-----------|
| Cl(2)#2-Mn(1)-Cl(2) | 87.967(5) |
| Cl(2)#3-Mn(1)-Cl(2) | 92.033(5) |
| Mn(1)-Cl(2)-Mn(1)#5 | 167.85(4) |
| C(2)-N(1)-H(1NA)    | 109.5     |
| C(2)-N(1)-H(1NB)    | 109.5     |
| H(1NA)-N(1)-H(1NB)  | 109.5     |
| C(2)-N(1)-H(1NC)    | 109.5     |
| H(1NA)-N(1)-H(1NC)  | 109.5     |
| H(1NB)-N(1)-H(1NC)  | 109.5     |
| C(3)-C(1)-C(3)#4    | 125.4(6)  |
| C(3)-C(1)-H(1A)     | 106.0     |
| C(3)#4-C(1)-H(1A)   | 106.0     |
| C(3)-C(1)-H(1B)     | 106.0     |
| C(3)#4-C(1)-H(1B)   | 106.0     |
| H(1A)-C(1)-H(1B)    | 106.3     |
| C(3)-C(2)-N(1)      | 123.9(4)  |
| C(3)-C(2)-H(2A)     | 106.3     |
| N(1)-C(2)-H(2A)     | 106.3     |
| C(3)-C(2)-H(2B)     | 106.3     |
| N(1)-C(2)-H(2B)     | 106.3     |
| H(2A)-C(2)-H(2B)    | 106.4     |
| C(2)-C(3)-C(1)      | 123.1(5)  |
| C(2)-C(3)-H(3A)     | 106.6     |
| C(1)-C(3)-H(3A)     | 106.6     |
| C(2)-C(3)-H(3B)     | 106.6     |
| C(1)-C(3)-H(3B)     | 106.6     |
| H(3A)-C(3)-H(3B)    | 106.5     |

---

Symmetry transformations used to generate equivalent atoms:

#1  $-x+1/2, -y+1/2, -z+3/2$     #2  $x, y-1/2, -z+2$     #3  $-x+1/2, -y+1, z-1/2$   
#4  $-x+1, -y+1/2, z$     #5  $-x+1/2, -y+1, z+1/2$

Table S4. Anisotropic displacement parameters ( $\text{\AA}^2 \times 10^3$ ) for Imma\_a. The anisotropic displacement factor exponent takes the form:  $-2\pi^2 [h^2 a^{*2} U^{11} + \dots + 2 h k a^* b^* U^{12}]$

|       | $U^{11}$ | $U^{22}$ | $U^{33}$ | $U^{23}$ | $U^{13}$ | $U^{12}$ |
|-------|----------|----------|----------|----------|----------|----------|
| Mn(1) | 15(1)    | 12(1)    | 12(1)    | 0        | 1(1)     | 0        |
| Cl(1) | 15(1)    | 37(1)    | 18(1)    | 0        | 0(1)     | 0        |
| Cl(2) | 21(1)    | 41(1)    | 44(1)    | -32(1)   | 0        | 0        |
| N(1)  | 16(2)    | 64(3)    | 21(2)    | 0        | -2(1)    | 0        |
| C(1)  | 17(3)    | 92(6)    | 29(3)    | 0        | 0        | 0        |
| C(2)  | 16(2)    | 129(6)   | 21(2)    | 0        | 1(2)     | 0        |
| C(3)  | 15(2)    | 167(9)   | 28(2)    | 0        | 1(2)     | 0        |

Table S5. Hydrogen coordinates (  $\times 10^4$ ) and isotropic displacement parameters ( $\text{\AA}^2 \times 10^{-3}$ ) for Imma\_a.

|        | x    | y    | z    | U(eq) |
|--------|------|------|------|-------|
| H(1NA) | 3173 | 2500 | 1824 | 50    |
| H(1NB) | 3410 | 1461 | 3395 | 50    |
| H(1NC) | 3410 | 3539 | 3395 | 50    |
| H(1A)  | 5000 | 3607 | 1065 | 55    |
| H(1B)  | 5000 | 1393 | 1065 | 55    |
| H(2A)  | 3975 | 1392 | 1019 | 66    |
| H(2B)  | 3975 | 3608 | 1019 | 66    |
| H(3A)  | 4467 | 1391 | 3581 | 84    |
| H(3B)  | 4467 | 3609 | 3581 | 84    |
